# Supplementary material for: Rationally designed hierarchical N-doped carbon@NiCo2O4 double-shelled nanoboxes for enhanced visible light CO2 reduction
Source: Royal Society of Chemistry journal article supplement (doi:10.1039/c7ee02934a), 2018-01-01
Supplement: c7ee02934a1.pdf [file c7ee02934a1.pdf]

## Electronic Supplementary Information

---

### **Rationally designed hierarchical N-doped carbon@NiCo<sub>2</sub>O<sub>4</sub> double-shelled nanoboxes for enhanced visible light CO<sub>2</sub> reduction**

*Sibo Wang, Bu Yuan Guan and Xiong Wen (David) Lou\**

School of Chemical and Biomedical Engineering, Nanyang Technological University,

62 Nanyang Drive, Singapore, 637459, Singapore

E-mail: xwlou@ntu.edu.sg; davidlou88@gmail.com

#### **Experimental details**

*Synthesis of Fe<sub>2</sub>O<sub>3</sub> nanocubes.* The Fe<sub>2</sub>O<sub>3</sub> nanocubes were synthesized according to a modified hydrothermal method.<sup>1</sup> Typically, 25 mL of 2.0 M FeCl<sub>3</sub>·6H<sub>2</sub>O solution was stirred in an oil bath at 75 °C for 5 min. Then, 25 mL of 5.4 M NaOH solution was added by a syringe with a rate of 10 mL min<sup>-1</sup>. After stirring at the same temperature for 10 min, the obtained Fe(OH)<sub>3</sub> gel was maintained in a preheated oven at 100 °C for 4 days. The red product was collected and washed three times with deionized (DI) water and ethanol, and dried at 70 °C for 12 h.

*Synthesis of Fe<sub>2</sub>O<sub>3</sub>@PDA core-shelled nanocubes.* 320 mg of the Fe<sub>2</sub>O<sub>3</sub> nanocube template was homogeneously dispersed in Tris-buffer solution (400 mL, 10 mM) by sonication for 30 min, followed by the addition of 160 mg of dopamine hydrochloride and stirred for 3 h. The resultant Fe<sub>2</sub>O<sub>3</sub>@PDA product was collected by centrifugation, washed with DI water and ethanol three times, and dried at 70 °C for 12 h.

*Synthesis of N-doped carbon (NC) nanoboxes.* 160 mg of the Fe<sub>2</sub>O<sub>3</sub>@PDA core-shelled nanocubes were annealed in N<sub>2</sub> at 500 °C for 3 h with a heating rate of 5 °C min<sup>-1</sup>. Then, the annealed product was dispersed in 100 mL of 4 M HCl solution and stirred at 70 °C for 1 h to completely remove the template. The obtained NC nanoboxes were collected by centrifugation, washed with ethanol three times, and then further annealed in N<sub>2</sub> at 700 °C for 2 h with a heating rate of 5 °C min<sup>-1</sup>.

*Synthesis of hierarchical NC@NiCo<sub>2</sub>O<sub>4</sub> double-shelled nanoboxes.* 10 mg of NC nanoboxes was first dispersed in 10 mL of ethanol solution containing 200 mg of polyvinylpyrrolidone (PVP,  $M_w = 40000$ ) and stirred for 12 h. The PVP-functionalized NC nanoboxes were collected by centrifugation, and washed with ethanol. Then, the resultant PVP-modified NC nanoboxes were dispersed in 10 mL of ethanol and 40 mL of H<sub>2</sub>O by sonication for 30 min, followed by the addition of 0.1 mmol of Ni(NO<sub>3</sub>)<sub>2</sub>·6H<sub>2</sub>O and 0.2 mmol of Co(NO<sub>3</sub>)<sub>2</sub>·6H<sub>2</sub>O. After stirring for 5 min, 0.5 mmol of hexamethylenetetramine and 0.05 mmol of trisodium citrate was added to the mixture and stirred for 10 min. The resultant mixture was refluxed in an oil bath at 90 °C for 6 h with rigorous stirring. After cooling down to room temperature, the NC@Ni-Co LDH precursor was harvested by centrifugation, washed with ethanol three times, and dried at 70 °C for 12 h. Finally, the precursor was further annealed in air at 300 °C with a heating rate of 5 °C min<sup>-1</sup> to harvest the hierarchical NC@NiCo<sub>2</sub>O<sub>4</sub> double-shelled nanoboxes.

*Materials characterization.* Field-emission scanning electron microscope (FESEM; JEOL-6700) and transmission electron microscope (TEM; JEOL, JEM-2010) were used to examine the morphology and structure of the samples. The crystal phases of the samples were analyzed by X-ray diffraction (XRD) on a Bruker D2 Phaser X-Ray Diffractometer with Ni filtered Cu  $K\alpha$  radiation ( $\lambda = 1.5406 \text{ \AA}$ ) at a voltage of 30 kV and a current of 10 mA. The compositions of the samples were analyzed by energy-dispersive X-ray spectroscopy (EDX) attached to the FESEM instrument. Elemental mapping images were recorded using EDX spectroscopy attached to TEM (JEOL, JEM-2100F). X-ray photoelectron spectra (XPS) were collected on a PHI Quantum 2000 XPS system with the C 1s peak (284.6 eV) as a reference. N<sub>2</sub> adsorption measurements were taken on a Micromeritics ASAP 2020 system at liquid N<sub>2</sub> temperature. Specific surface area was determined by the Brunauer-Emmett-Teller (BET) method. N<sub>2</sub> and CO<sub>2</sub> adsorption isotherms were collected on an ASAP2020M apparatus. The samples were degassed in vacuum at 120 °C for 12 h and then measured at 77 K and 0 °C, respectively. UV-vis diffuse reflectance spectra (DRS) were obtained using a Varian Cary 500 UV-vis-NIR spectrometer equipped with an integrating sphere and BaSO<sub>4</sub> was used as reference. Photoluminescence (PL) spectra were performed on Edinburgh Analytical Instruments FL/FSTCSPC920 coupled with a time-correlated single-photo-counting system at room temperature. An Agilent 7820A gas chromatograph (GC) equipped with a thermal conductivity detector (TCD)

and a packed column (TDX-01) was utilized to analyze and quantify the gases produced from the CO<sub>2</sub> photoreduction system with Ar as the carrier gas. An HP 5973 gas chromatography-mass spectrometer (GC-MS) was employed to analyze the gaseous products generated from the <sup>13</sup>CO<sub>2</sub> (97% enriched) isotopic experiment and to determine whether other potential products were generated in the liquid phase. The used column in GC-MS analysis for the products of the isotopic experiments is HP-MOLESIEVE (30 m × 0.32 mm, Agilent Technologies, Serial number: USD 130113H). The temperature of the inlet and oven is 200 °C and 45 °C, respectively. The carrier gas is helium (He) with a flow of 0.6 mL min<sup>-1</sup>.

*Photocatalytic CO<sub>2</sub> reduction.* In the typical photocatalytic CO<sub>2</sub> reduction reaction, NC@NiCo<sub>2</sub>O<sub>4</sub> (1 mg), [Ru(bpy)<sub>3</sub>]Cl<sub>2</sub>·6H<sub>2</sub>O (10 μmol, abbreviated as **Ru**, bpy = 2'2'-bipyridine), solvent (5 mL, H<sub>2</sub>O/acetonitrile, V/V = 2:3), and triethanolamine (TEOA, 1 mL) were added in a gas-closed glass reactor (80 mL in capacity). Then, high purity CO<sub>2</sub> was introduced to the reactor with a partial pressure of 1 atm. A 300W Xe lamp with a 420 nm cutoff filter was used as the light source. The temperature of the reaction system was kept at 30 °C by cooling water. During the photocatalytic process, the reaction system was vigorously stirred with a magnetic stirrer. After reaction for a certain time, the generated products were sampled and quantified by an Agilent 7820A gas chromatograph.

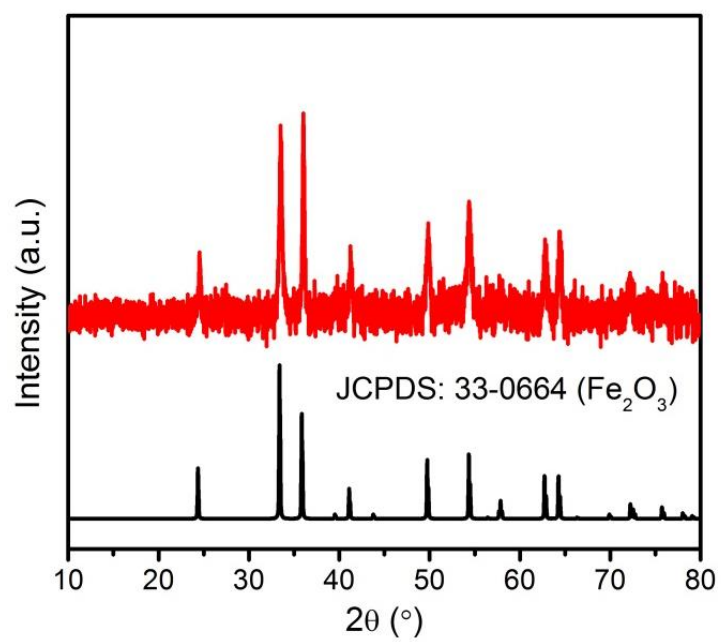

**Fig. S1** XRD pattern of Fe<sub>2</sub>O<sub>3</sub> nanocubes.

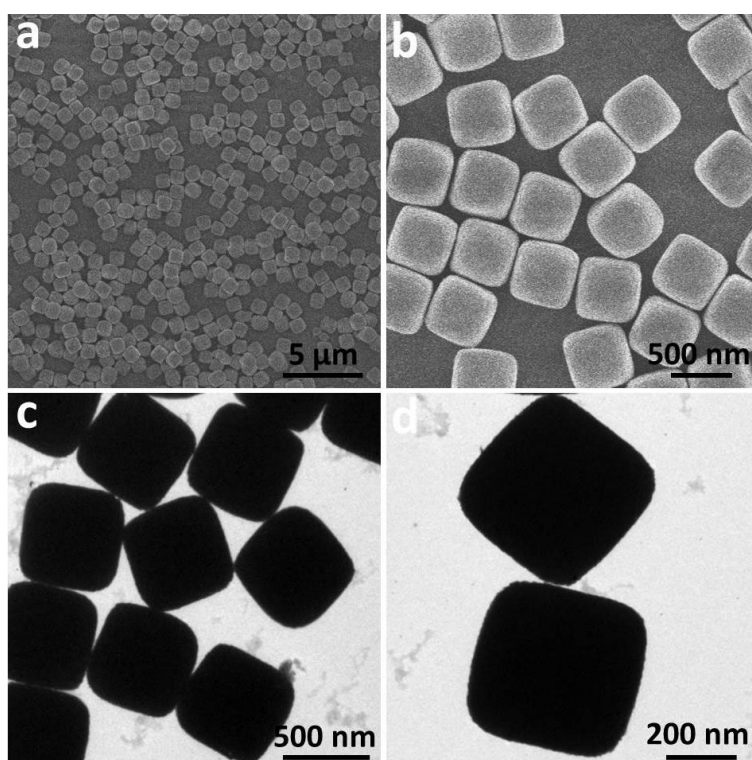

**Fig. S2** (a,b) FESEM and (c,d) TEM images of Fe<sub>2</sub>O<sub>3</sub> nanocubes.

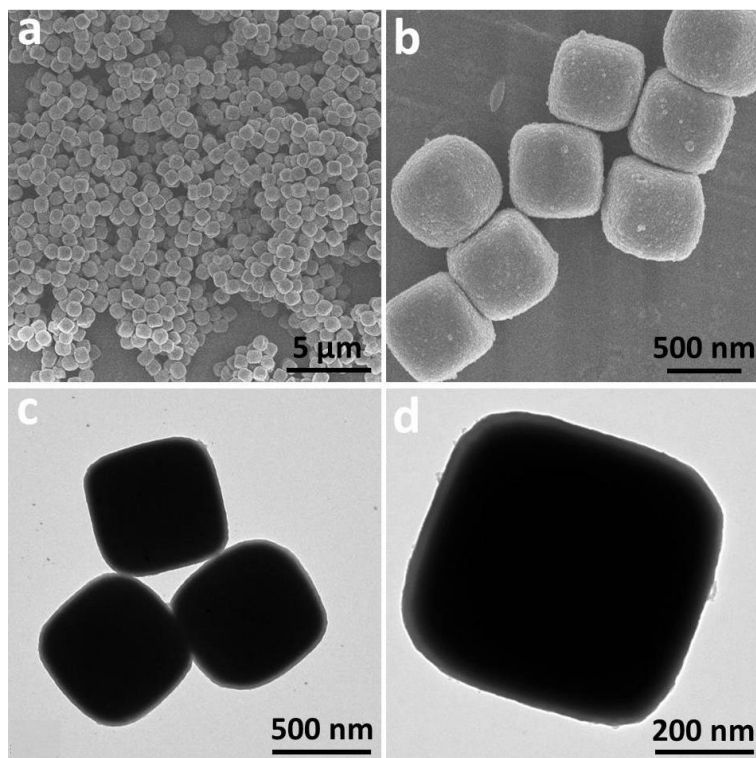

**Fig. S3** (a,b) FESEM and (c,d) TEM images of  $\text{Fe}_2\text{O}_3$ @PDA core-shelled nanocubes.

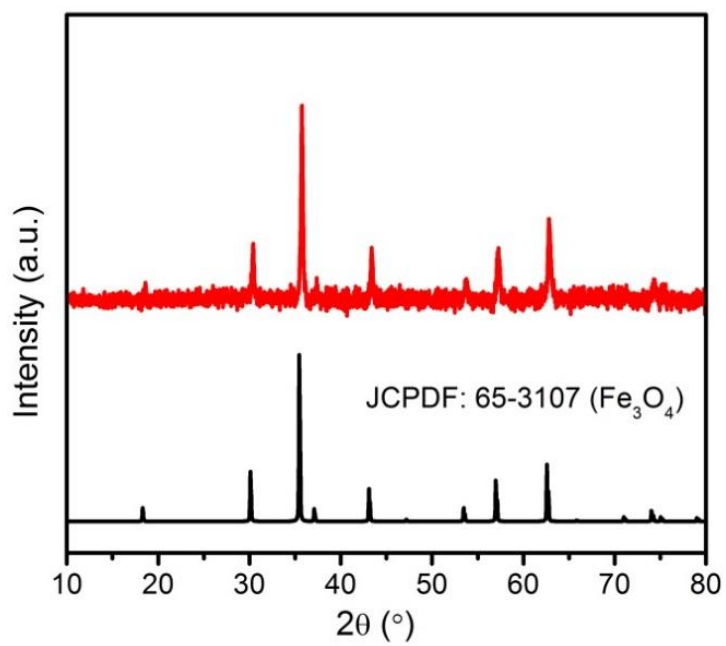

**Fig. S4** XRD pattern of  $\text{Fe}_3\text{O}_4$ @NC core-shelled nanocubes.

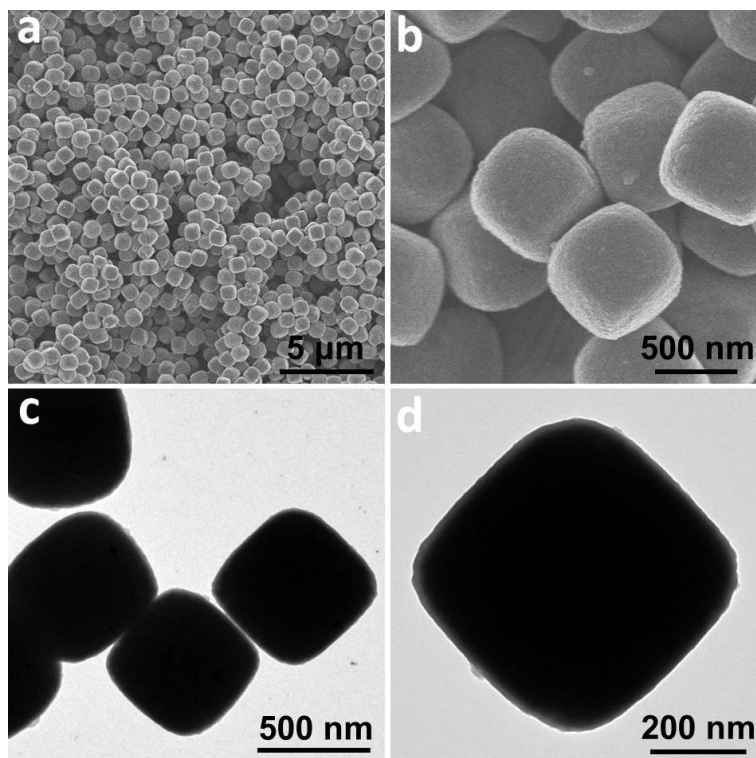

**Fig. S5** FESEM and (c,d) TEM images of  $\text{Fe}_3\text{O}_4@\text{NC}$  core-shelled nanocubes.

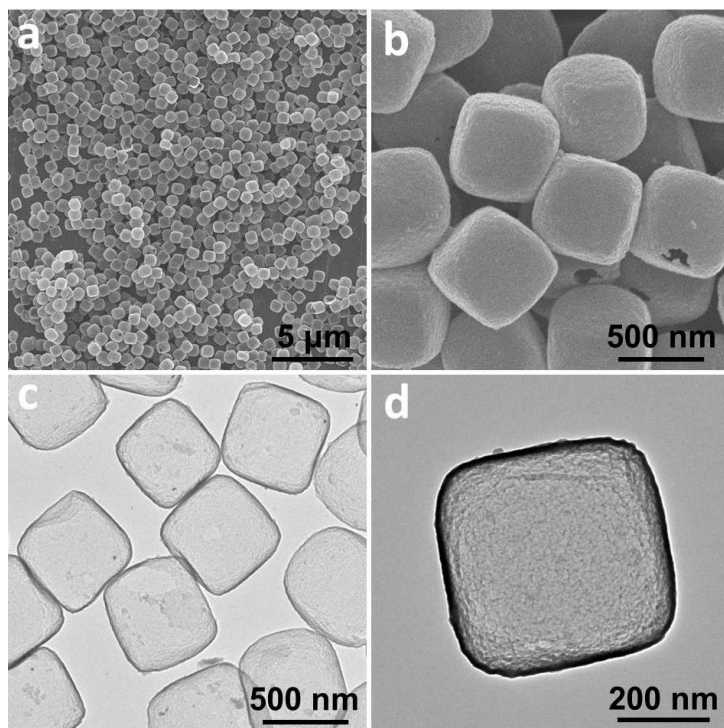

**Fig. S6** (a,b) FESEM and (c,d) TEM images of NC nanoboxes.

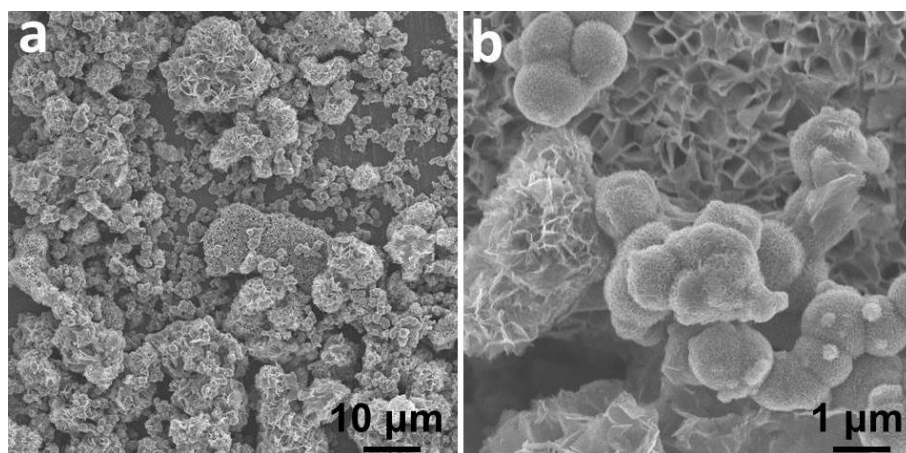

**Fig. S7** FESEM images of the bulk  $\text{NiCo}_2\text{O}_4$  particles synthesized in absence of NC nanoboxes.

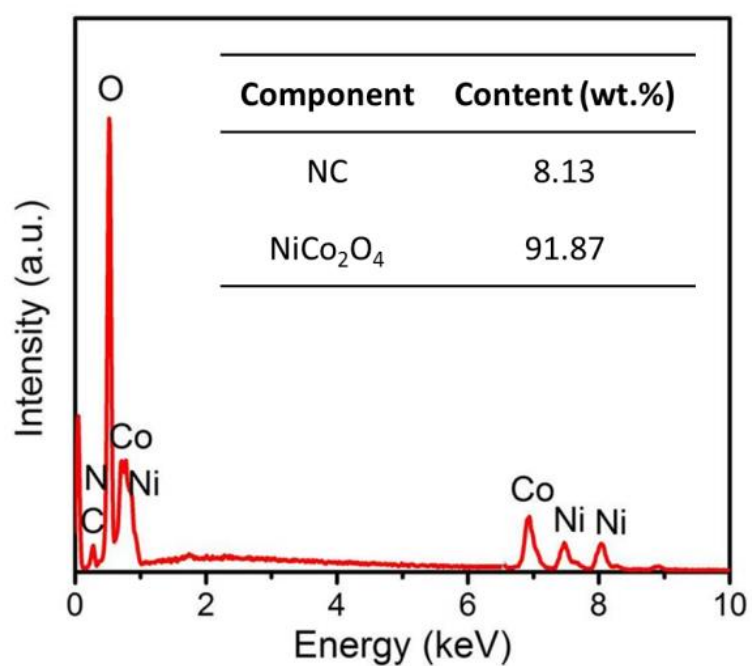

**Fig. S8** EDX spectrum of hierarchical  $\text{NC}@\text{NiCo}_2\text{O}_4$  double-shelled nanoboxes.



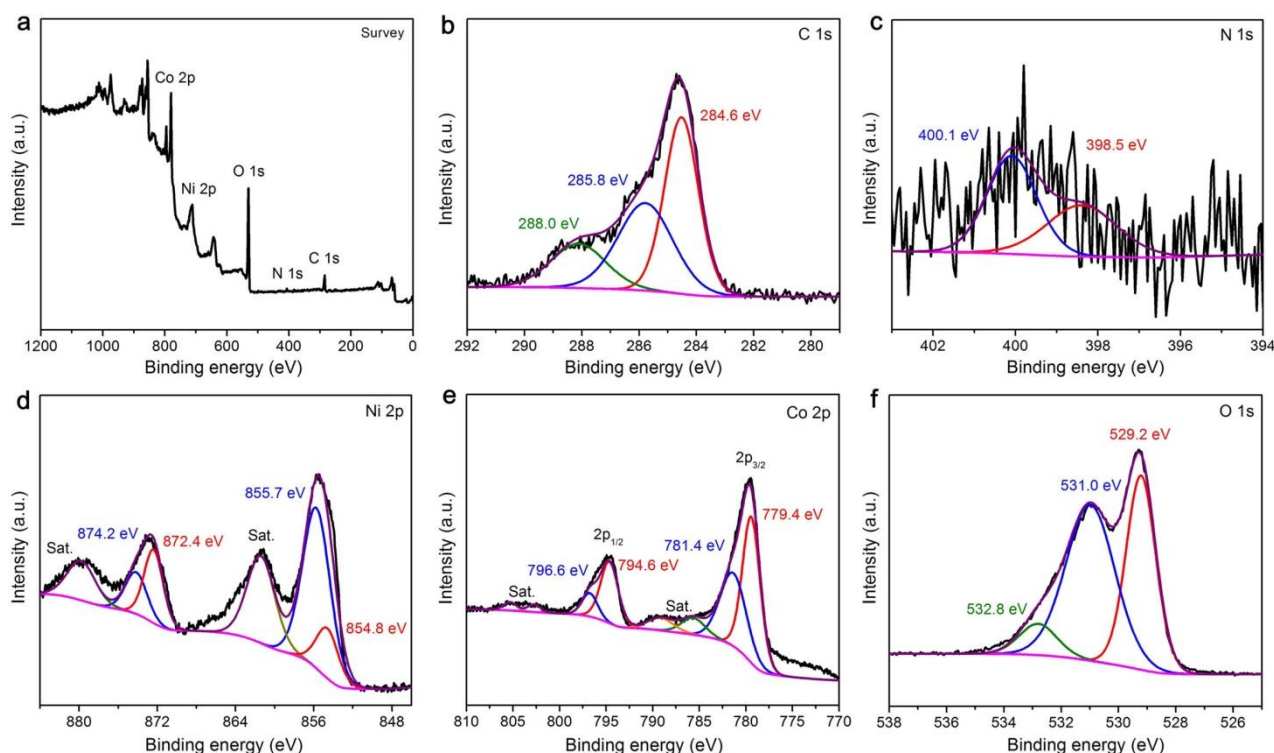

**Fig. S9** XPS spectra of hierarchical NC@NiCo<sub>2</sub>O<sub>4</sub> double-shelled nanoboxes: (a) survey spectrum and high resolution spectra of (b) C 1s, (c) N 1s, (d) Ni 2p, (e) Co 2p, and (f) O 1s.

The survey spectrum gives the signals of C, N, Ni, Co and O elements (Fig. S9a), consistent with the results of EDX tests (Fig. S8). The XPS spectrum of C 1s can be divided into three peaks (Fig. S9b). The main peak at 284.6 eV corresponds to the graphite-like  $sp^2$  C, and the small peaks at 285.8 and 288.0 eV are attributed to the N- $sp^2$  C and N- $sp^3$  C bonds, respectively.<sup>2</sup> The N 1s XPS spectrum can be deconvoluted into two peaks at binding energies of 398.5 and 400.1 eV (Fig. S9c), corresponding to C-N and C=N bonds, respectively.<sup>3,4</sup> The high-resolution Ni 2p spectrum is well fitted considering two spin-orbit double characteristic of Ni<sup>2+</sup> and Ni<sup>3+</sup> with binding energy at 854.8 eV, 872.4 eV and 855.7 eV, 874.2 eV (Fig. S9d), respectively.<sup>5</sup> The peaks at around 861.3 and 879.8 eV are indexed to the two shake-up satellites of nickel. In the Co 2p spectrum (Fig. S9e), two kinds of Co species are detected. The binding energy at 779.4 eV and 794.6 eV are ascribed to Co<sup>3+</sup>, and the binding energy at 781.4 eV and 796.6 eV are assigned to Co<sup>2+</sup>.<sup>5,6</sup> In the XPS spectrum of O 1s (Fig. S9f), the three peaks centered at 529.2, 531.0 and 532.8 eV are correspondingly attributed to the lattice oxygen, the oxygen of hydroxide ions, and the oxygen of physically adsorbed water molecules.<sup>5,7</sup>



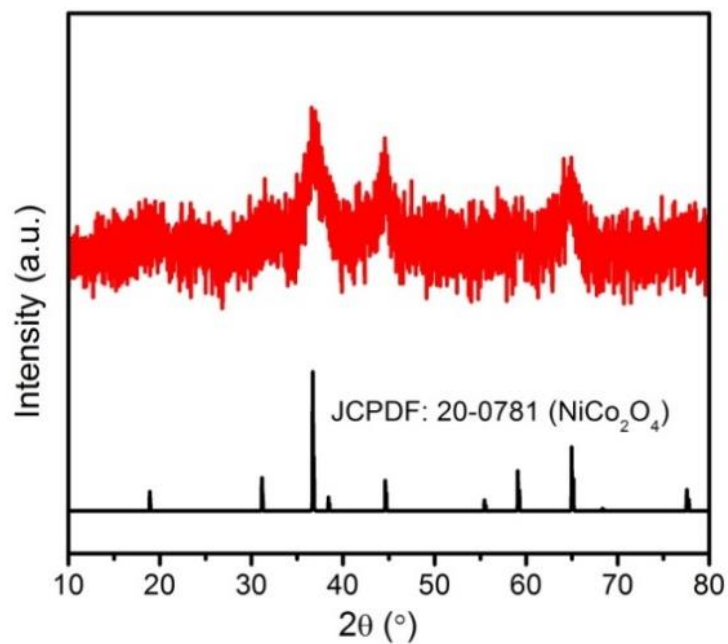

**Fig. S10** XRD pattern of hierarchical NC@NiCo<sub>2</sub>O<sub>4</sub> double-shelled nanoboxes.

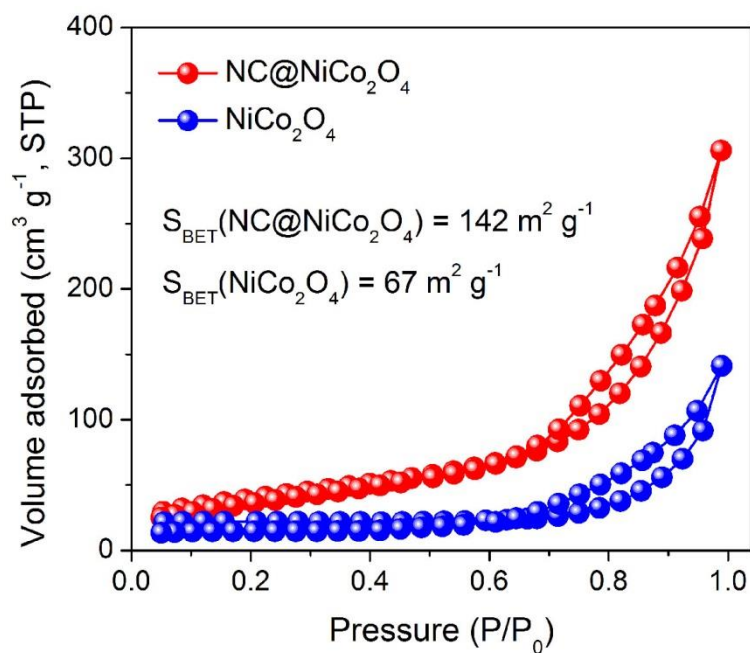

**Fig. S11** N<sub>2</sub> sorption isotherms and BET surface areas of NC@NiCo<sub>2</sub>O<sub>4</sub> nanoboxes and bulk NiCo<sub>2</sub>O<sub>4</sub> particles.

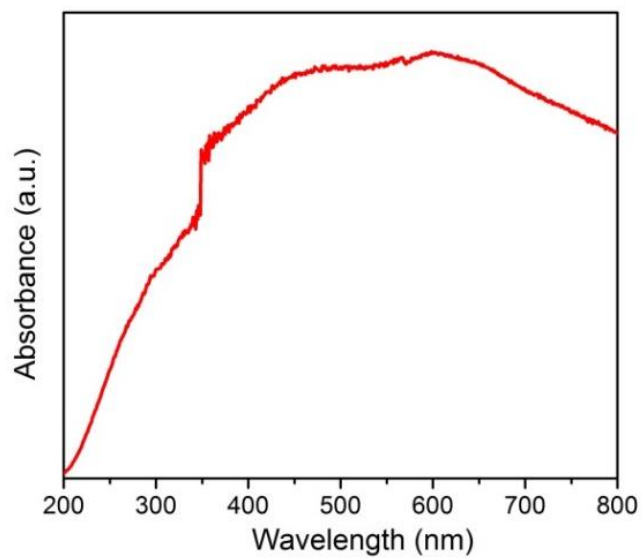

**Fig. S12** UV-Vis diffuse reflectance spectrum (DRS) of hierarchical NC@NiCo<sub>2</sub>O<sub>4</sub> double-shelled nanoboxes.

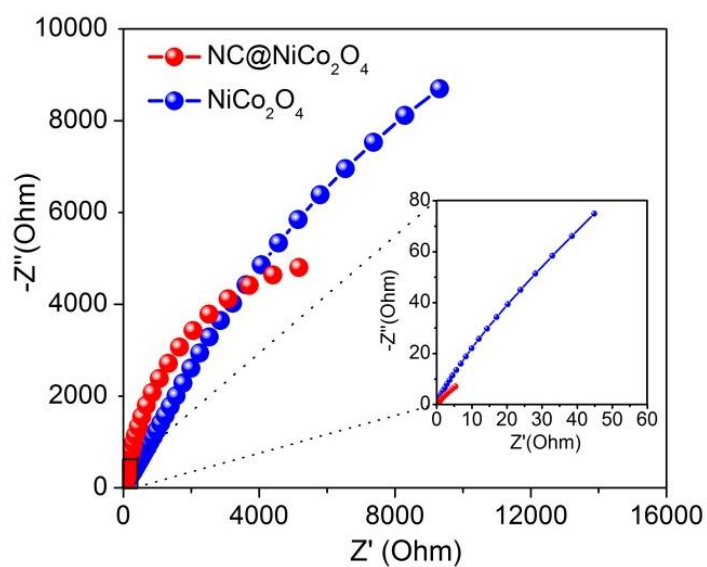

**Fig. S13** Nyquist plots of hierarchical NC@NiCo<sub>2</sub>O<sub>4</sub> double-shelled nanoboxes and bulk NiCo<sub>2</sub>O<sub>4</sub> particles.

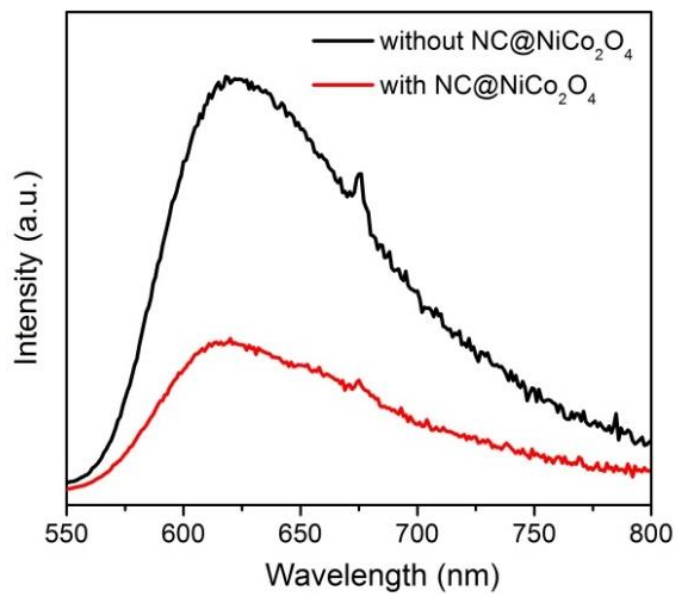

**Fig. S14** PL spectra of the photocatalytic CO<sub>2</sub> reduction systems with and without hierarchical NC@NiCo<sub>2</sub>O<sub>4</sub> double-shelled nanoboxes as the catalyst under 500 nm laser irradiation at room temperature.

**Table S1.** Comparison of photocatalytic CO<sub>2</sub> conversion performance.

| Catalyst<br>(used amount)                                                           | Cocatalyst<br>sacrificial agent                                   | Major product evolution<br>rate (μmol h <sup>-1</sup> ) <sup>a</sup> | Reference |
|-------------------------------------------------------------------------------------|-------------------------------------------------------------------|----------------------------------------------------------------------|-----------|
| NC@NiCo <sub>2</sub> O <sub>4</sub><br>(1 mg)                                       | Ru(bpy) <sub>3</sub> <sup>2+</sup><br>TEOA                        | CO: 26.2                                                             | This work |
| Co <sub>3</sub> O <sub>4</sub><br>(10 mg)                                           | Ru(bpy) <sub>3</sub> <sup>2+</sup><br>TEOA                        | CO: 20.03                                                            | 8         |
| Ni(TPA/TEG)<br>(1 mg)                                                               | Ru(bpy) <sub>3</sub> <sup>2+</sup><br>TEOA                        | CO: 26.6                                                             | 9         |
| MAF-X27/-OH<br>(1.77 mg)                                                            | Ru(bpy) <sub>3</sub> <sup>2+</sup><br>TEOA                        | CO: 14                                                               | 10        |
| CoSn(OH) <sub>6</sub><br>(1 mg)                                                     | Ru(bpy) <sub>3</sub> <sup>2+</sup><br>TEOA                        | CO: 18.7                                                             | 11        |
| [Co <sub>2</sub> (OH)L <sup>1</sup> ](ClO <sub>4</sub> ) <sub>3</sub><br>(0.025 μM) | [Ru(phen) <sub>3</sub> ](PF <sub>6</sub> ) <sub>2</sub><br>TEOA   | CO: 2.11                                                             | 12        |
| BCN<br>(50 mg)                                                                      | Co(bpy) <sub>3</sub> <sup>2+</sup><br>TEOA                        | CO: 4.7                                                              | 13        |
| HR-CN<br>(30 mg)                                                                    | Co(bpy) <sub>3</sub> <sup>2+</sup><br>TEOA                        | CO: 8.9                                                              | 14        |
| Zr-bpdc/ <b>RuCO</b><br>(2.9 mg )                                                   | Ru(bpy) <sub>3</sub> <sup>2+</sup><br>TEOA                        | CO: 6.75<br>HCCOH: 23.175                                            | 15        |
| N-Ta <sub>2</sub> O <sub>5</sub><br>(50 mg)                                         | [Ru(dcbpy) <sub>2</sub> (CO) <sub>2</sub> ] <sup>2+</sup><br>TEOA | HCOOH: 3.5                                                           | 16        |
| <b>RuRu'</b> /mpg-C <sub>3</sub> N <sub>4</sub><br>(4 mg)                           | Ag<br>EDTA·2Na                                                    | COOH: 8.46                                                           | 17        |
| <b>RuRu'</b> /NS-C <sub>3</sub> N <sub>4</sub><br>(4 mg)                            | Ag<br>EDTA·2Na                                                    | COOH: 0.23                                                           | 18        |
| MOF-525-Co<br>(2 mg)                                                                | /<br>TEOA                                                         | CO: 0.403<br>CH <sub>4</sub> : 0.07                                  | 19        |
| UiO-66/CNNS<br>(1000 mg)                                                            | /<br>TEOA                                                         | CO: 9.79                                                             | 20        |
| NH <sub>2</sub> -MIL-125(Ti)<br>(50 mg)                                             | /<br>TEOA                                                         | COOH: 2                                                              | 21        |
| PCN-222<br>(50 mg)                                                                  | /<br>TEOA                                                         | COOH: 6.25                                                           | 22        |

<sup>a</sup> Product evolution rate is calculated based on the added amount of catalyst in CO<sub>2</sub> reduction system.

## Supplementary References

1. X. Y. Yu, H. Hu, Y. Wang, H. Chen and X. W. Lou, *Angew. Chem. Int. Ed.*, 2015, **54**, 7395.
2. F. Yang, Z. Zhang, K. Du, X. Zhao, W. Chen, Y. Lai and J. Li, *Carbon*, 2015, **91**, 88.
3. L. Zhao, Y. S. Hu, H. Li, Z. Wang and L. Chen, *Adv. Mater.*, 2011, **23**, 1385.
4. Y. Ma, C. Zhang, G. Ji and J. Y. Lee, *J. Mater. Chem.*, 2012, **22**, 7845.
5. Z. Wang, M. Jiang, J. Qin, H. Zhou and Z. Ding, *Phys. Chem. Chem. Phys.*, 2015, **17**, 16040.
6. L. Qian, L. Gu, L. Yang, H. Y. Yuan and D. Xiao, *Nanoscale*, 2013, **5**, 7388.
7. R. J. Zou, K. B. Xu, T. Wang, G. J. He, Q. Liu, X. J. Liu, Z. Y. Zhang and J. Q. Hu, *J. Mater. Chem. A*, 2013, **1**, 8560.
8. C. Gao, Q. Meng, K. Zhao, H. Yin, D. Wang, J. Guo, S. Zhao, L. Chang, M. He, Q. Li, H. Zhao, X. Huang, Y. Guo and Z. Tang, *Adv. Mater.*, 2016, **28**, 6485.
9. K. Niu, Y. Xu, H. Wang, R. Ye, H. L. Xin, F. Lin, C. Tian, Y. Lum, K. C. Bustillo, M. M. Doeff, M. T. M. Koper, J. Ager, R. Xu and H. Zheng, *Sci. Adv.*, 2017, **3**, e1700921.
10. Y. Wang, N. Y. Huang, J. Q. Shen, P. Q. Liao, X. M. Chen and J. P. Zhang, *J. Am. Chem. Soc.*, 2018, DOI: 10.1021/jacs.7b10107.
11. X. Lin, Y. Gao, M. Jiang, Y. Zhang, Y. Hou, W. Dai, S. Wang and Z. Ding, *Appl. Catal. B Environ.*, 2018, **224**, 1009.
12. T. Ouyang, H. H. Huang, J. W. Wang, D. C. Zhong and T. B. Lu, *Angew. Chem. Int. Ed.*, 2017, **56**, 738.
13. C. Huang, C. Chen, M. Zhang, L. Lin, X. Ye, S. Lin, M. Antonietti and X. Wang, *Nat. Commun.*, 2015, **6**, 7698.
14. Y. Zheng, L. Lin, X. Ye, F. Guo and X. Wang, *Angew. Chem. Int. Ed.*, 2014, **53**, 11926.

15. T. Kajiwara, M. Fujii, M. Tsujimoto, K. Kobayashi, M. Higuchi, K. Tanaka and S. Kitagawa, *Angew. Chem. Int. Ed.*, 2016, **55**, 2697.
16. S. Sato, T. Morikawa, S. Saeki, T. Kajino and T. Motohiro, *Angew. Chem. Int. Ed.*, 2010, **49**, 5101.
17. R. Kuriki, H. Matsunaga, T. Nakashima, K. Wada, A. Yamakata, O. Ishitani and K. Maeda, *J. Am. Chem. Soc.*, 2016, **138**, 5159.
18. R. Kuriki, M. Yamamoto, K. Higuchi, Y. Yamamoto, M. Akatsuka, D. Lu, S. Yagi, T. Yoshida, O. Ishitani and K. Maeda, *Angew. Chem. Int. Ed.*, 2017, **56**, 4867.
19. H. Zhang, J. Wei, J. Dong, G. Liu, L. Shi, P. An, G. Zhao, J. Kong, X. Wang, X. Meng, J. Zhang and J. Ye, *Angew. Chem. Int. Ed.*, 2016, **55**, 14310.
20. L. Shi, T. Wang, H. Zhang, K. Chang and J. Ye, *Adv. Funct. Mater.*, 2015, **25**, 5360.
21. Y. Fu, D. Sun, Y. Chen, R. Huang, Z. Ding, X. Fu and Z. Li, *Angew. Chem. Int. Ed.*, 2012, **51**, 3364.
22. H. Q. Xu, J. Hu, D. Wang, Z. Li, Q. Zhang, Y. Luo, S. H. Yu and H. L. Jiang, *J. Am. Chem. Soc.*, 2015, **137**, 13440.
